# Supplementary material for: Association of a FAM13A variant with interstitial lung disease in Japanese rheumatoid arthritis
Source: HighWire-hosted journal article supplement (doi:10.1136/rmdopen-2022-002828), 2023-01-01
Supplement: rmdopen-2022-002828supp001_data_supplement.pdf [file rmdopen-2022-002828supp001_data_supplement.pdf]

Supplementary table S1. Allele frequencies of *FAM13A* rs2609255 in the RA patients and controls.

| <i>FAM13A</i><br>rs2609255 | n     | Allele<br>[G] | Allele model |      |             |
|----------------------------|-------|---------------|--------------|------|-------------|
|                            |       |               | <i>P</i>     | OR   | 95%CI       |
| RA, n (%)                  | 628   | 554 (44.1)    | 0.0375       | 1.13 | (1.01-1.26) |
| Control, n (%)             | 38722 | 31895 (41.2)  |              |      |             |

Association was tested in the comparison with the control population by Fisher's exact test using 2x2 contingency tables.
